# Supplementary material
Source: Springer Nature journal article supplement (https://www.springermedizin.de/resource/supplementary/12865_2008_224_MOESM8_ESM.pdf/9427624)

1 **B**

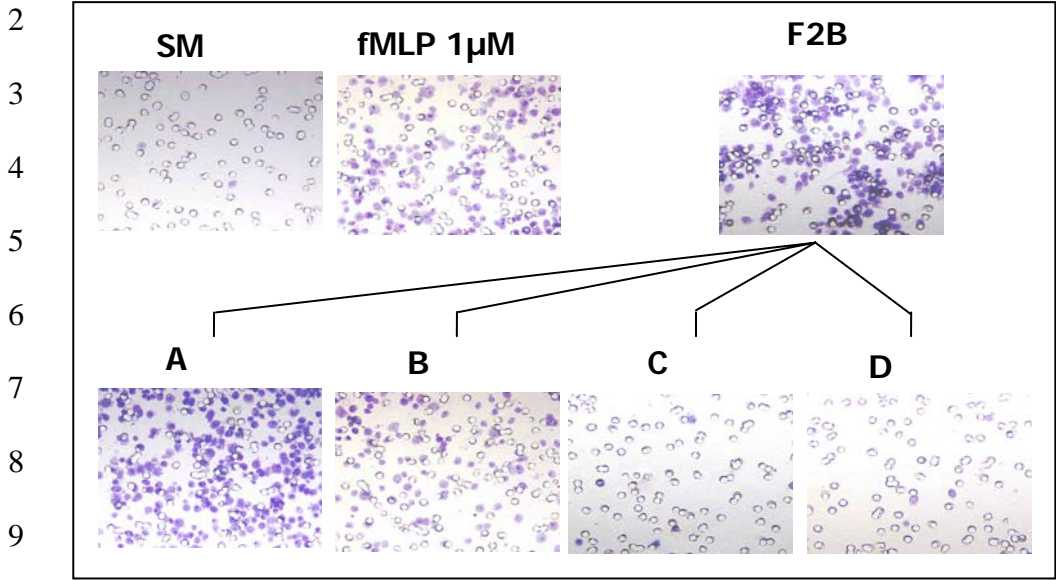

10 Illustration of B lymphoblasts L14 onto filter (magnitude X100)

11

12

13

14

15

16

17

18

19

20

Supplement: MOESM8 [file 9427624]
